# Supplementary material for: Modern Pollen Dataset of the Tibetan Plateau
Source: Copernicus journal article supplement (doi:10.5194/essd-2025-71), 2025-02-18
Supplement: Supplementary file [file essd-2025-71-AC1-supplement.zip]

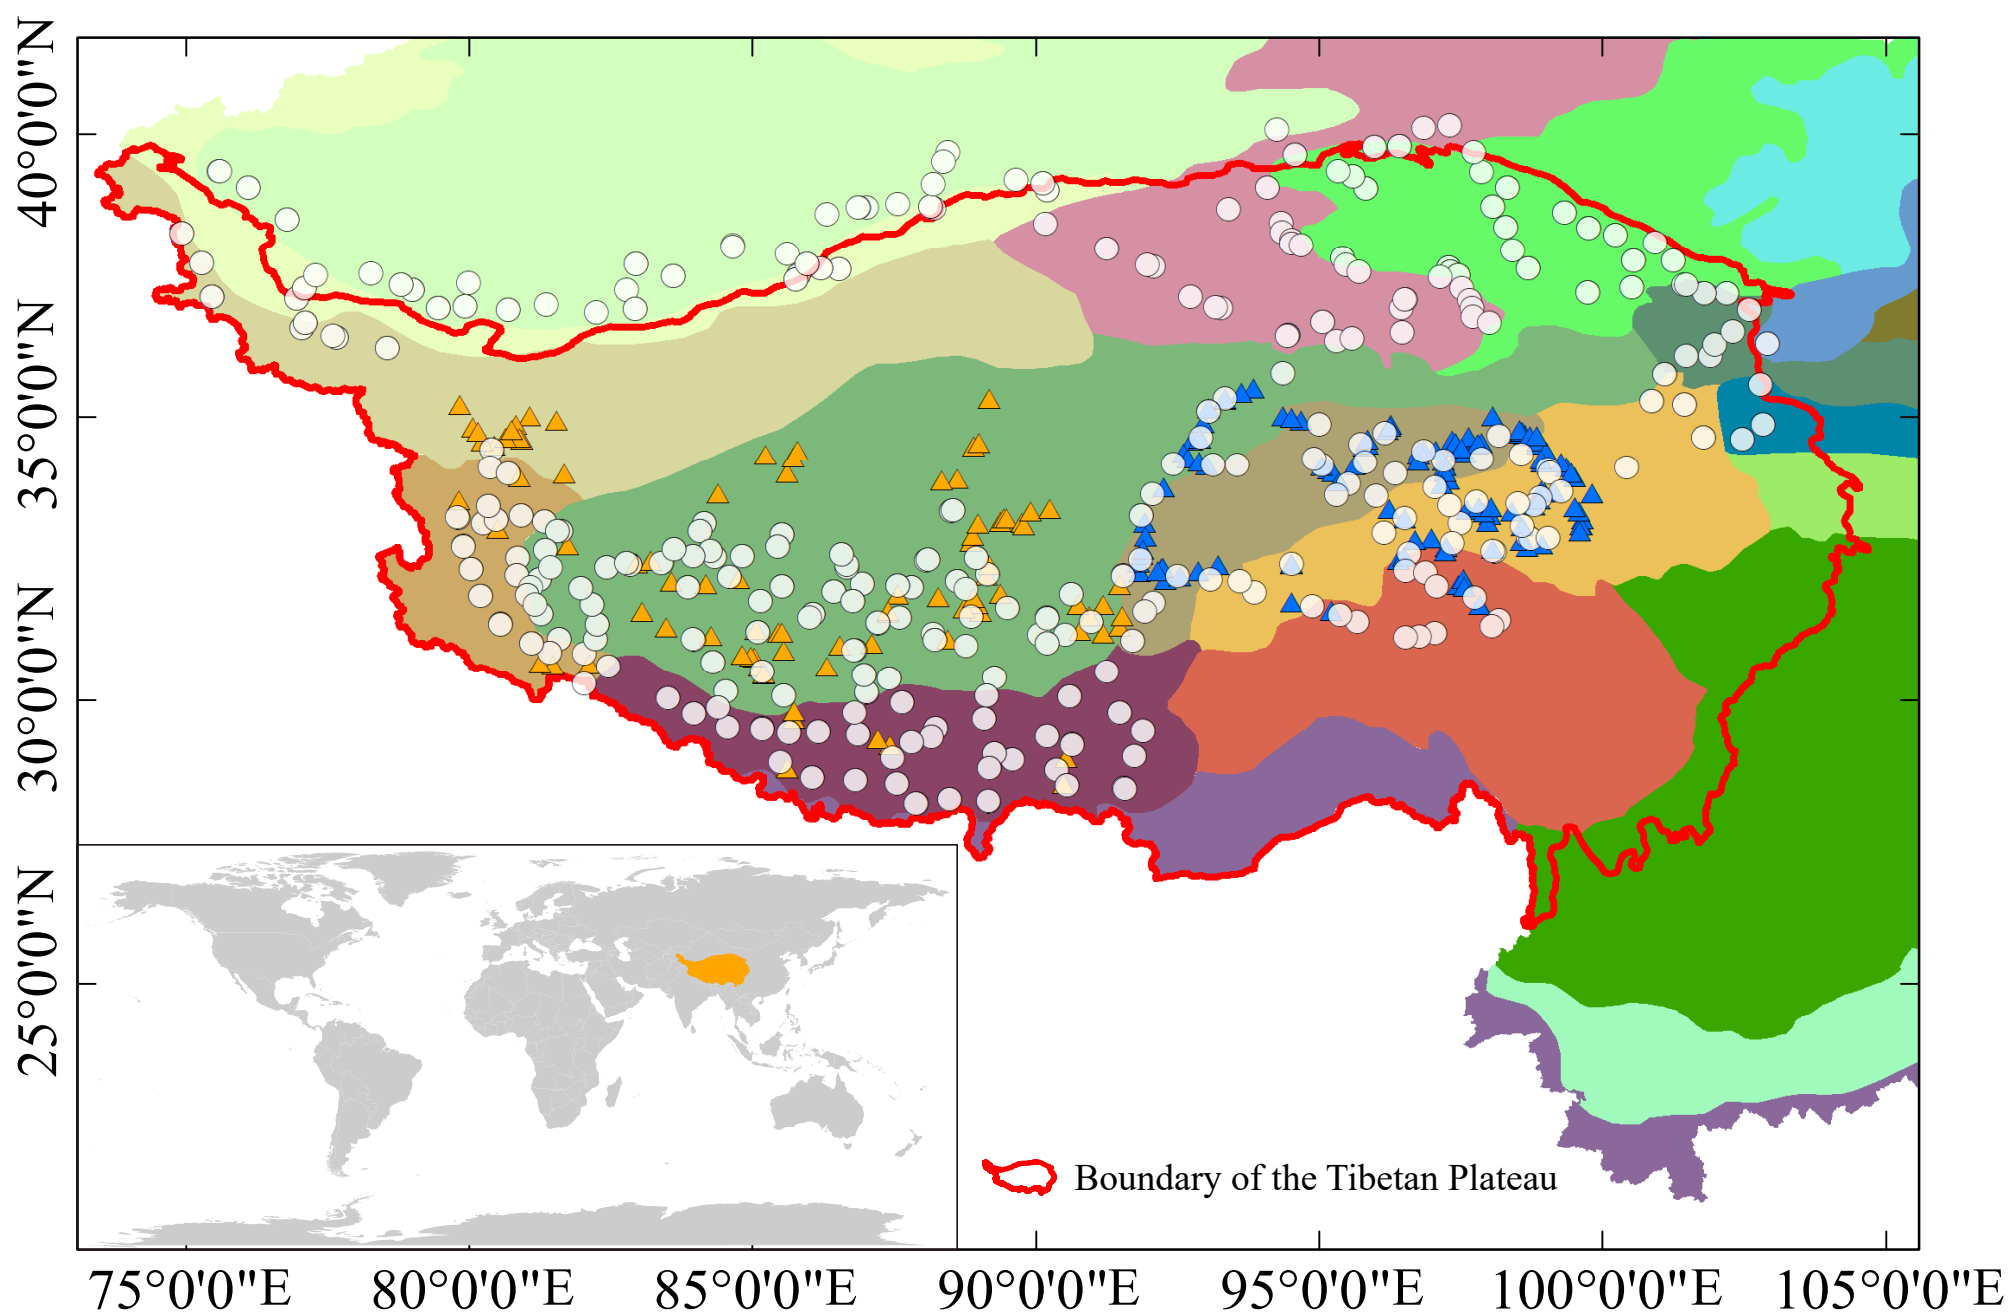

- Subtropical evergreen broad-leaved forest
- Subtropical montane cold and temperate coniferous forest
- Subtropical evergreen, deciduous broad-leaved mixed forest
- Tropical seasonal rainforest and semi-evergreen seasonal rainforest
- Subtropical monsoon evergreen broad-leaved forest
- Warm-temperate deciduous oak forest
- Warm-temperate shrub, subshrub and bare land
- Warm-temperate shrub, semi-fruticous desert
- Temperate meadow steppe
- Temperate subshrub and fruticous desert
- Temperate steppe

- Temperate forest (meadow) steppe
- Temperate desert steppe
- Temperate shrub, semi-fruticous desert
- Temperate shrub, semi-desert
- Temperate steppe
- Temperate desert
- Alpine shrub and alpine meadow
- Alpine steppe
- Alpine meadow
- Alpine desert
