# Supplementary material for: Modern Pollen Dataset of the Tibetan Plateau
Source: Copernicus journal article supplement (doi:10.5194/essd-2025-71), 2025-02-18

Site No.

5  
15  
25  
35  
45  
55  
65  
75  
85  
95  
105  
115  
125  
135  
145  
155  
165  
175  
185  
195  
205  
215  
225  
235  
245  
255  
265  
275  
285  
295  
305

*Pinus*  
*Picea+Abies*  
*Juglans*  
*Betula*  
*Nitraria*  
*Tamarix*  
Cyperaceae  
*Artemisia*  
Amaranthaceae  
Poaceae  
Asteraceae  
*Ephedra*  
Ranunculaceae  
Brassicaceae  
Fabaceae  
Polygonaceae  
Rosaceae  
Lamiaceae  
Caryophyllaceae  
*Thalictrum*  
Scrophulariaceae  
*Gentiana*  
Solanaceae  
Gentianaceae  
*Taraxacum*  
*Chrysanthemum*

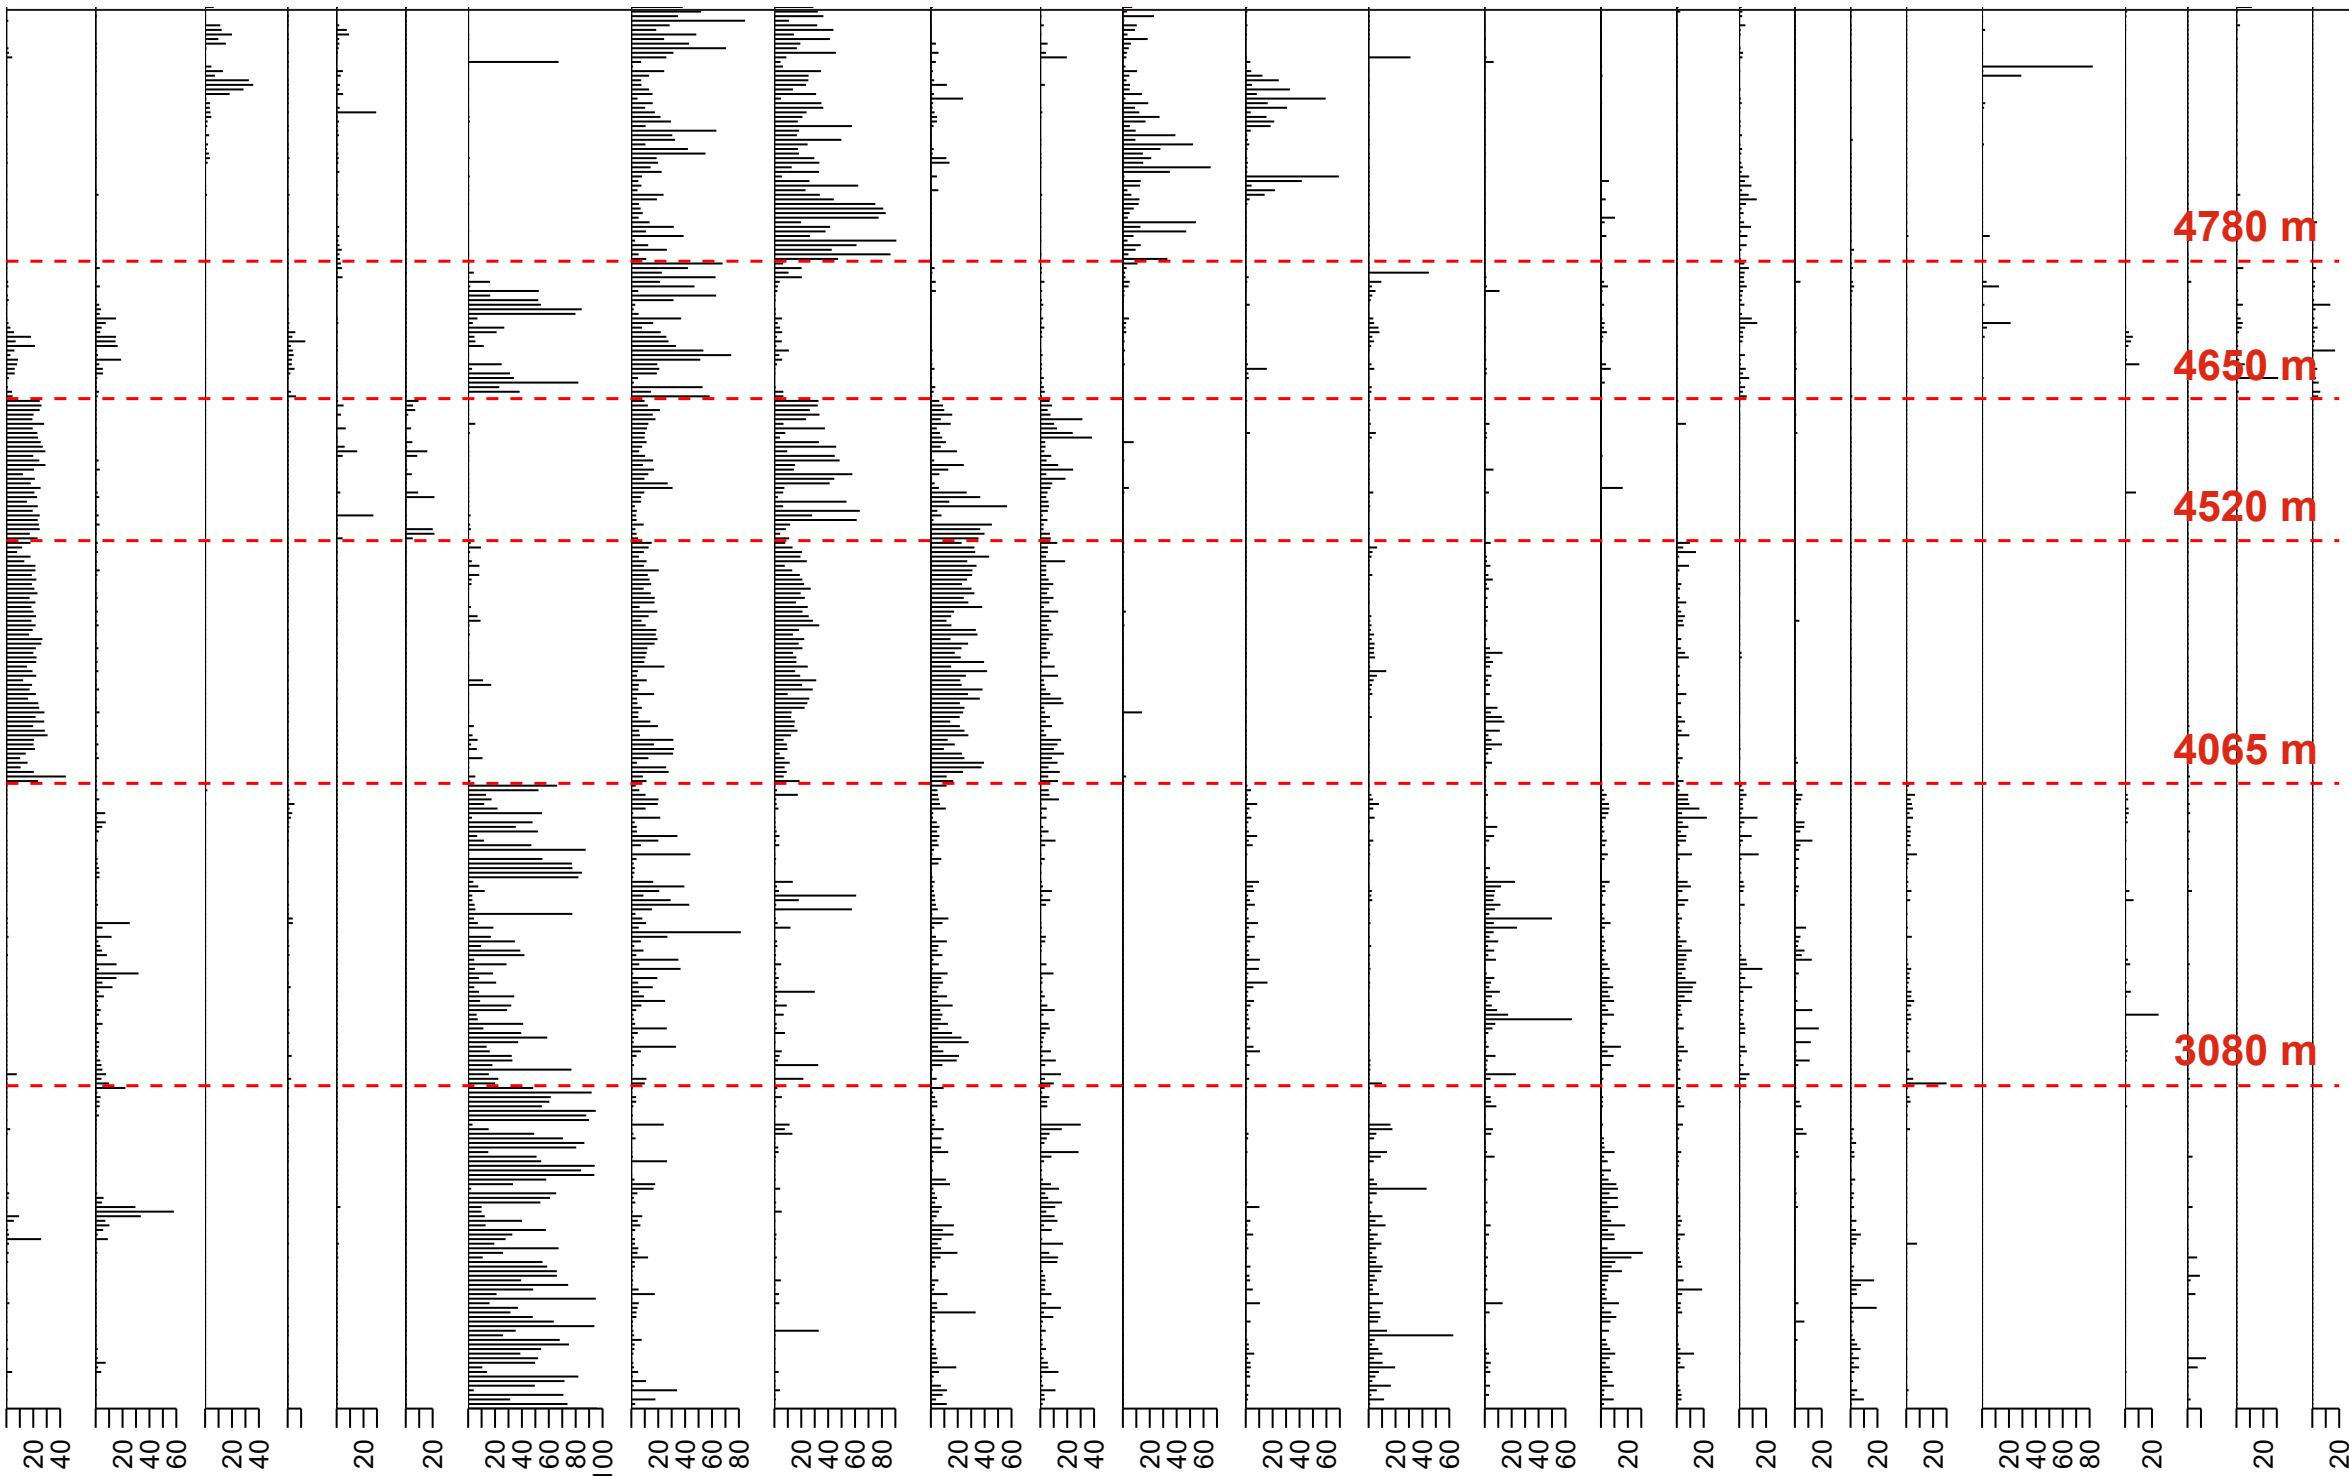

(%)

4780 m

4650 m

4520 m

4065 m

3080 m

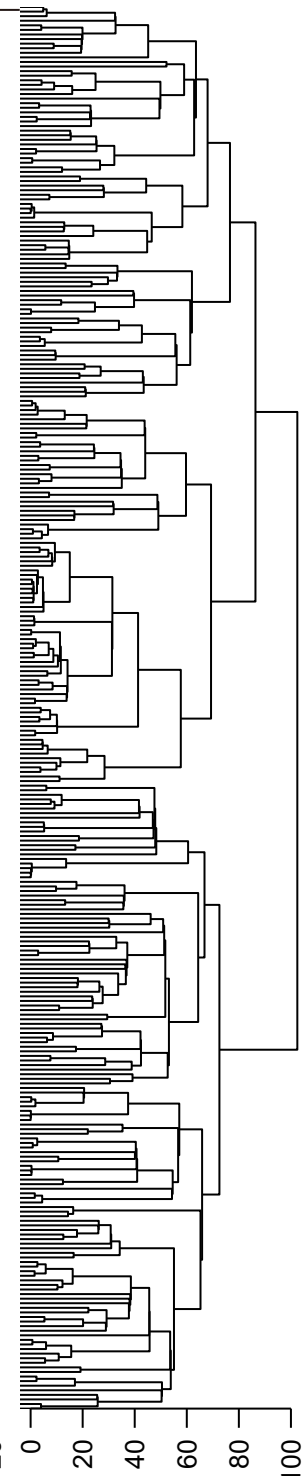

Supplement: Supplementary file [file essd-2025-71-AC1-supplement.zip]
