# Supplementary material for: Modern Pollen Dataset of the Tibetan Plateau
Source: Copernicus journal article supplement (doi:10.5194/essd-2025-71), 2025-02-18

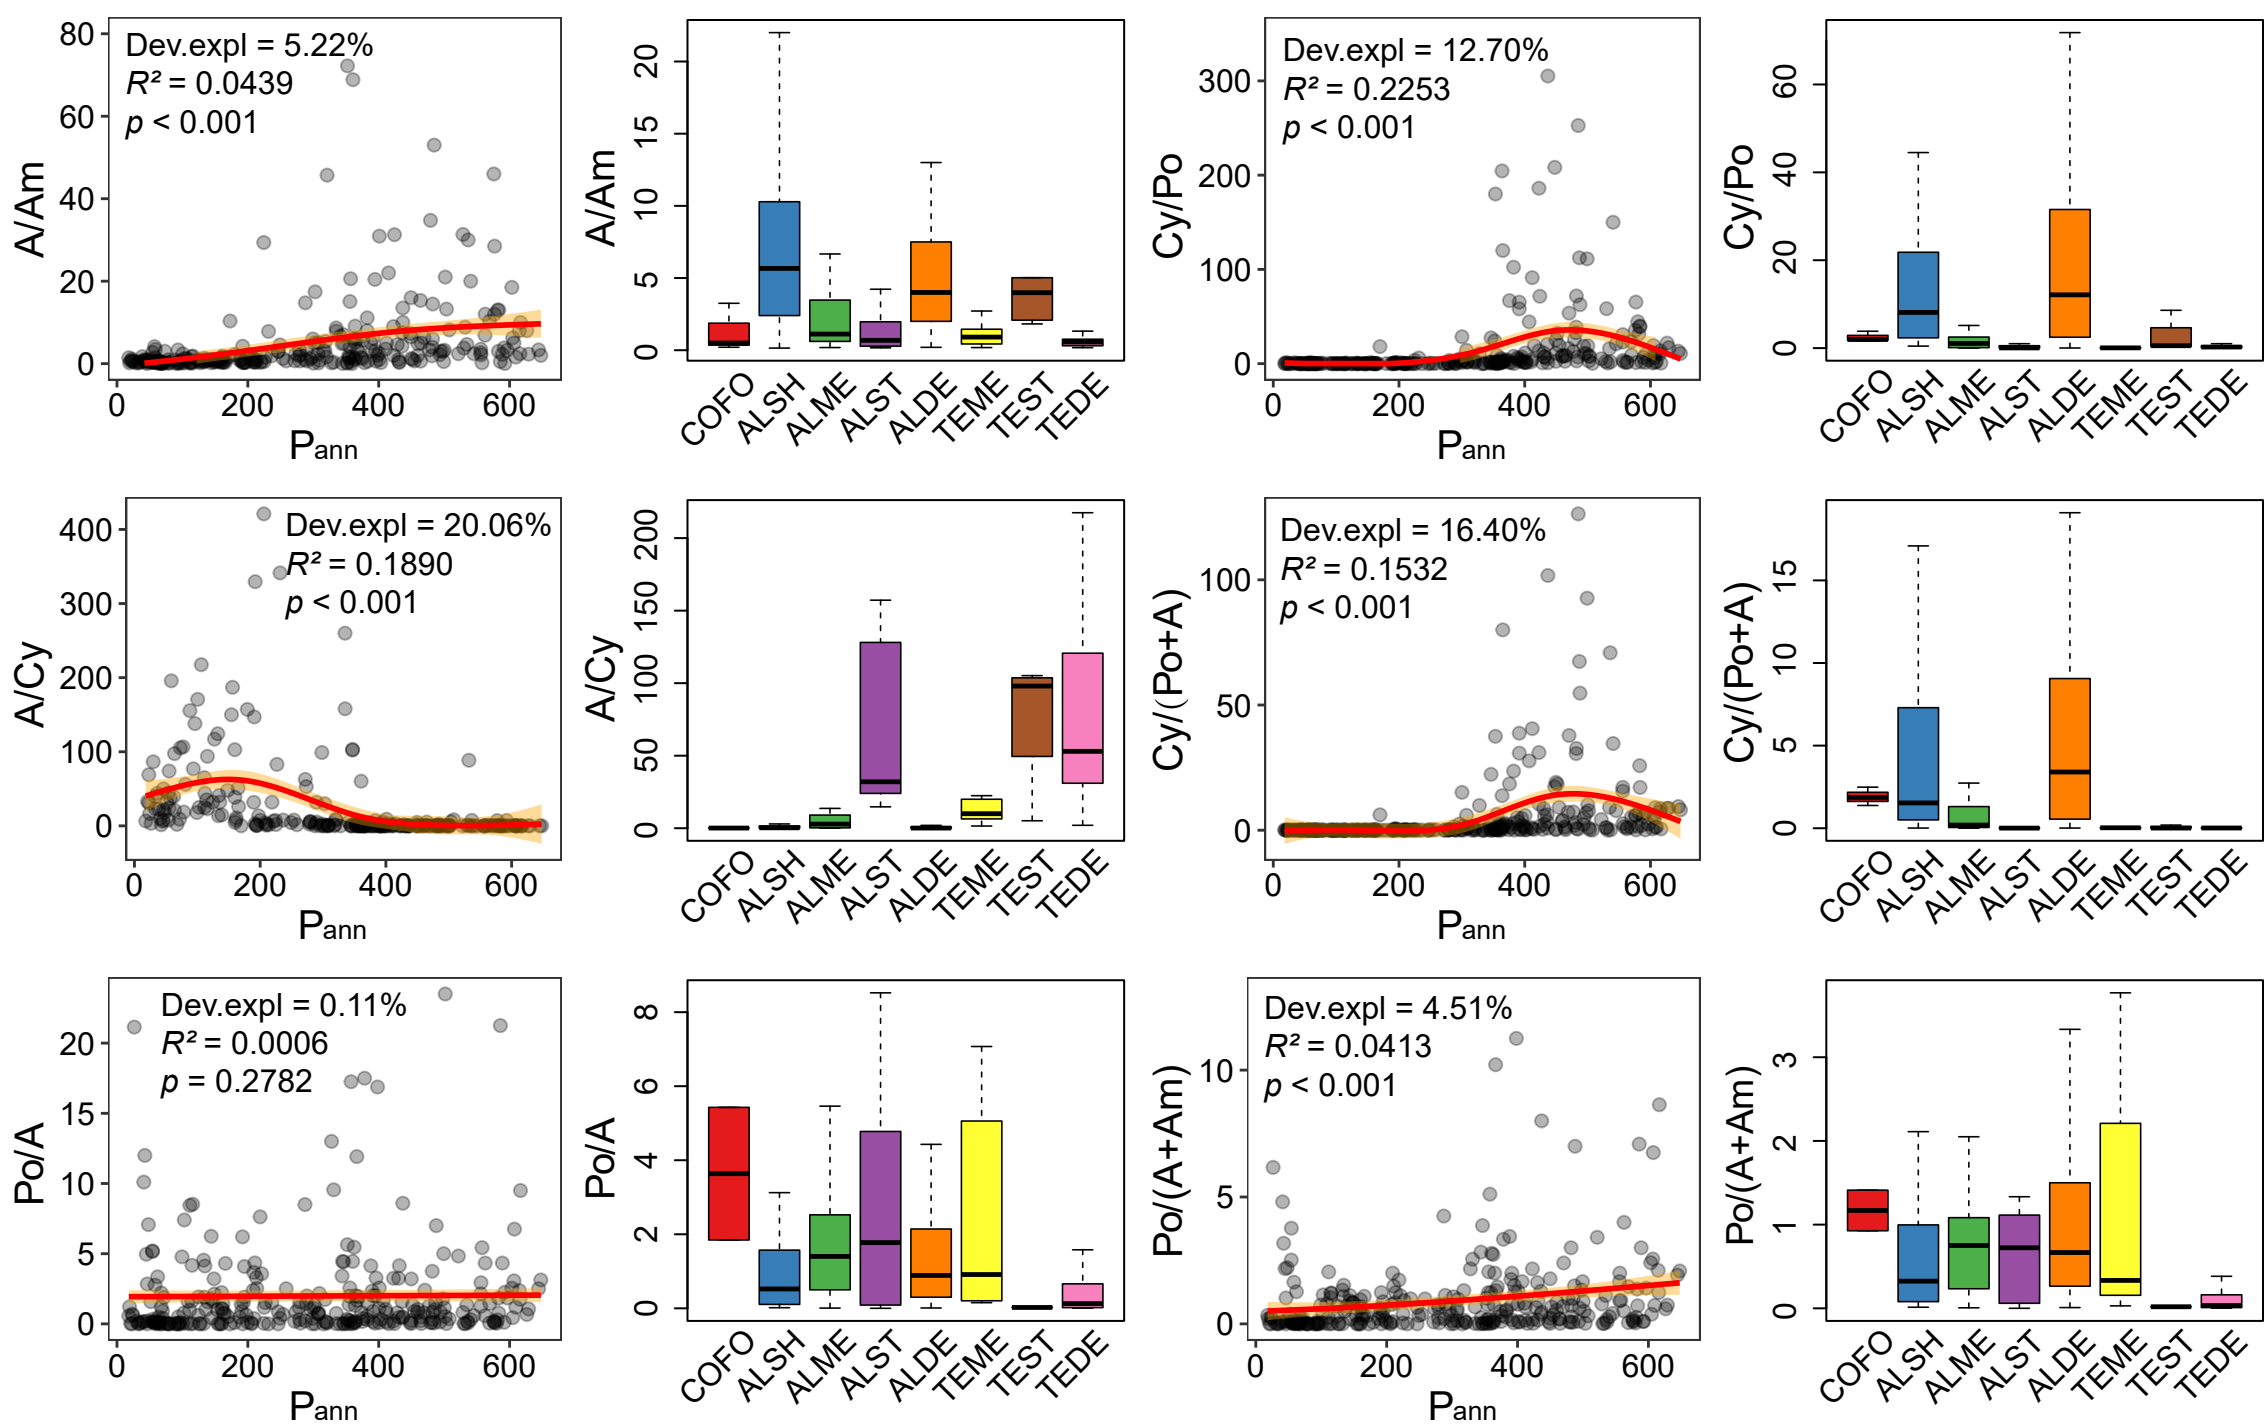

Supplement: Supplementary file [file essd-2025-71-AC1-supplement.zip]
